# Supplementary material
Source: PubMed Central journal article supplement (PMC5334463)

**A**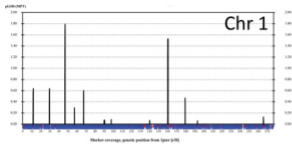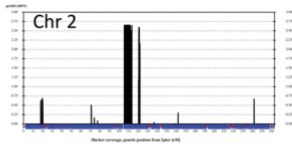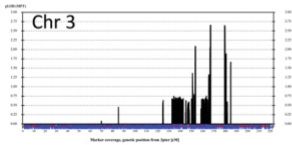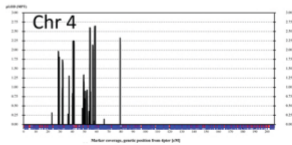

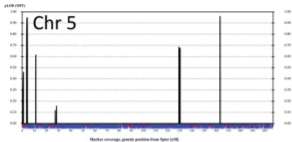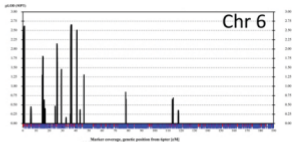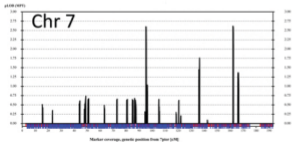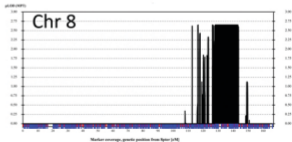

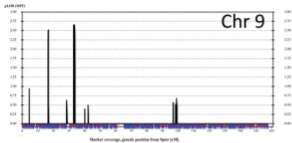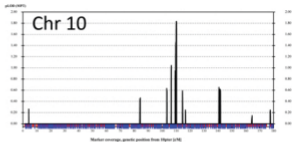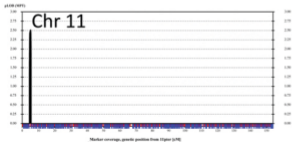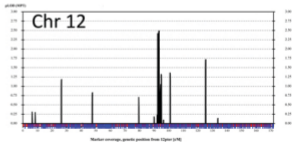

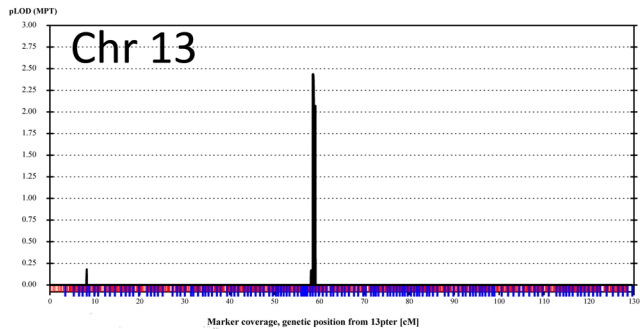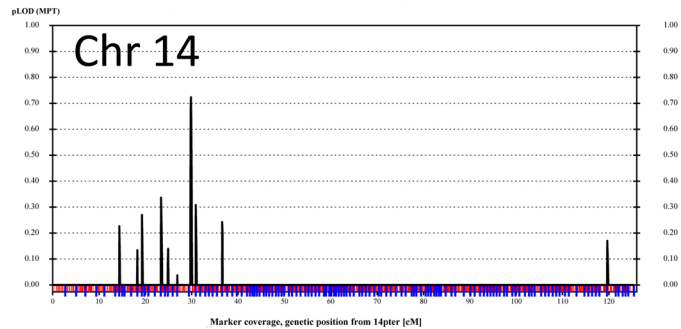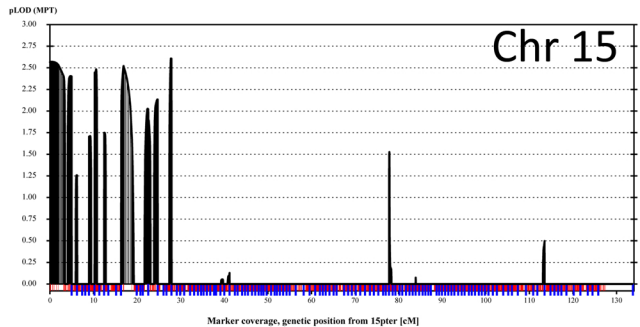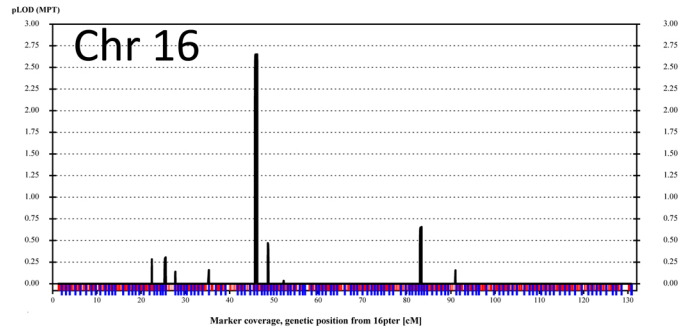

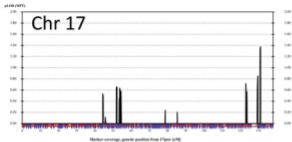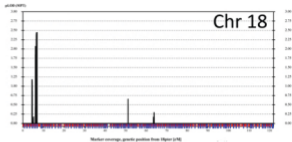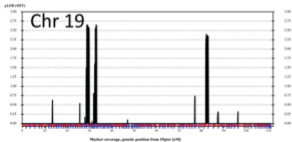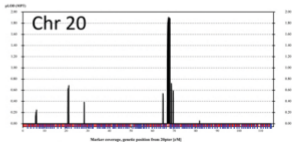

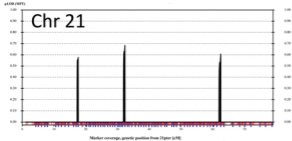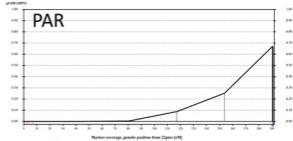

**B**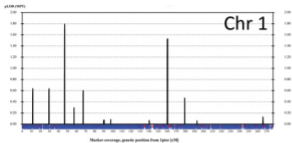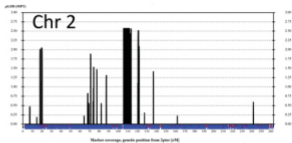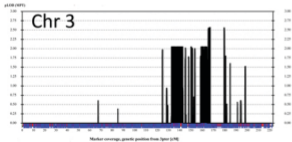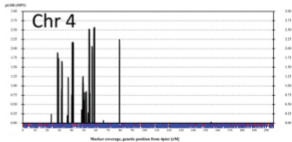

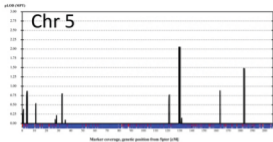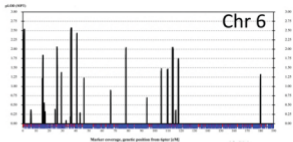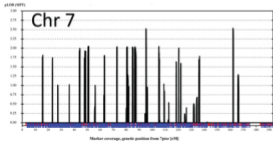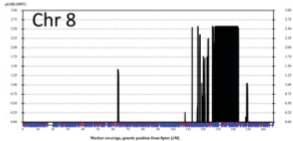



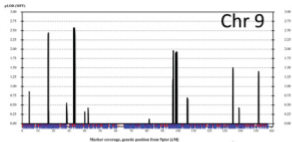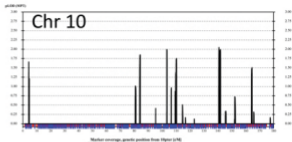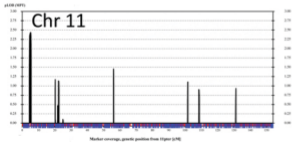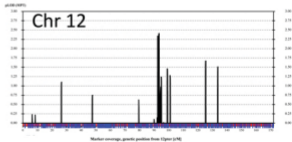

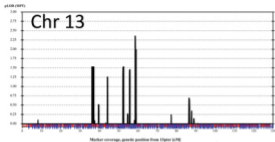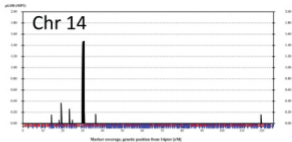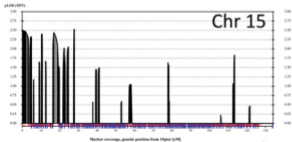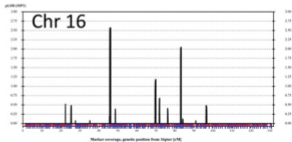

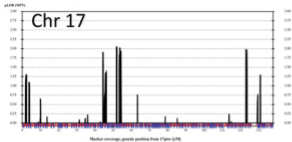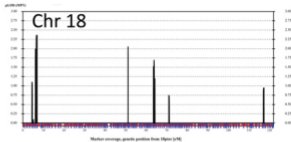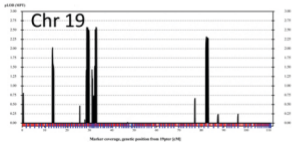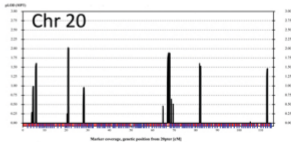

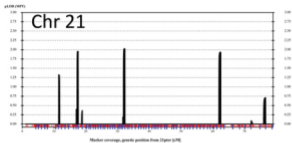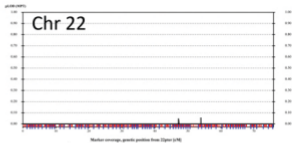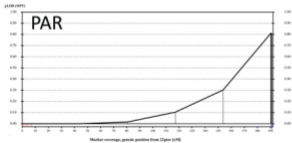

Supplement: ejhg2016183x4.pdf [file ejhg2016183x4.pdf]
